# Supplementary material for: Mutation-derived, genomic instability-associated lncRNAs are prognostic markers in gliomas
Source: PeerJ journal article supplement (doi:10.7717/peerj.15810), 2023-08-02

|              | <b>pvalue</b> | <b>Hazard ratio</b> |
|--------------|---------------|---------------------|
| LINC01579    | <0.001        | 1.210(1.160-1.262)  |
| AL022344.1   | <0.001        | 0.125(0.069-0.229)  |
| HOXC-AS1     | <0.001        | 1.258(1.165-1.359)  |
| AC025171.5   | <0.001        | 1.982(1.724-2.279)  |
| AC007344.1   | <0.001        | 1.274(1.160-1.399)  |
| MIR4435-2HG  | <0.001        | 1.250(1.192-1.310)  |
| LINC00836    | <0.001        | 0.788(0.728-0.853)  |
| LINC01116    | <0.001        | 1.123(1.090-1.157)  |
| LINC02525    | <0.001        | 1.851(1.566-2.187)  |
| MIR155HG     | <0.001        | 1.721(1.556-1.904)  |
| PIK3CD-AS2   | <0.001        | 1.475(1.345-1.617)  |
| AC005532.1   | <0.001        | 1.088(1.035-1.143)  |
| EGFR-AS1     | <0.001        | 1.749(1.365-2.242)  |
| AC131097.3   | <0.001        | 2.225(1.900-2.606)  |
| LINC00906    | <0.001        | 0.288(0.177-0.470)  |
| AC092957.1   | <0.001        | 1.179(1.093-1.272)  |
| AC016168.2   | <0.001        | 1.321(1.154-1.513)  |
| CYTOR        | <0.001        | 1.280(1.228-1.334)  |
| FAM201A      | <0.001        | 0.192(0.108-0.343)  |
| BX470102.1   | <0.001        | 2.380(1.948-2.907)  |
| MIR924HG     | <0.001        | 1.970(1.661-2.337)  |
| AC015540.1   | <0.001        | 0.555(0.477-0.646)  |
| AL390755.1   | <0.001        | 1.013(1.009-1.017)  |
| SLC25A21-AS1 | <0.001        | 0.383(0.314-0.467)  |
| LHX5-AS1     | <0.001        | 0.795(0.721-0.876)  |
| LINC02636    | <0.001        | 0.077(0.037-0.161)  |
| ELDR         | <0.001        | 1.175(1.093-1.263)  |
| HAR1A        | <0.001        | 0.475(0.365-0.618)  |
| OB1-AS1      | <0.001        | 0.724(0.608-0.863)  |
| CNIH3-AS2    | <0.001        | 1.225(1.155-1.298)  |
| AL035446.1   | <0.001        | 1.047(1.034-1.061)  |
| MADD-AS1     | <0.001        | 0.073(0.030-0.180)  |
| DNMBP-AS1    | <0.001        | 0.565(0.408-0.782)  |
| H19          | <0.001        | 1.010(1.007-1.013)  |
| AL049871.1   | <0.001        | 1.174(1.085-1.269)  |
| AC008080.4   | <0.001        | 1.138(1.088-1.191)  |
| AL133415.1   | <0.001        | 1.311(1.252-1.373)  |
| AC010655.2   | <0.001        | 1.592(1.408-1.800)  |
| SOCS2-AS1    | <0.001        | 1.099(1.065-1.134)  |
| HOTAIR       | <0.001        | 1.165(1.107-1.225)  |
| SNHG18       | <0.001        | 1.332(1.261-1.408)  |
| AC021242.3   | <0.001        | 1.145(1.083-1.210)  |
| LINC01831    | <0.001        | 1.513(1.359-1.685)  |
| AC022239.1   | <0.001        | 0.252(0.120-0.531)  |
| CNIH3-AS1    | 0.004         | 1.143(1.045-1.251)  |
| AL022313.4   | <0.001        | 0.885(0.852-0.918)  |
| AC091932.1   | <0.001        | 1.243(1.144-1.350)  |
| AL391845.2   | 0.006         | 0.663(0.496-0.887)  |
| AL512785.1   | <0.001        | 1.090(1.048-1.134)  |
| AGAP2-AS1    | <0.001        | 1.011(1.006-1.016)  |
| AC092958.1   | <0.001        | 1.073(1.043-1.104)  |
| FOXD3-AS1    | <0.001        | 1.136(1.100-1.174)  |
| CDK6-AS1     | <0.001        | 1.137(1.098-1.177)  |
| AC002428.2   | <0.001        | 0.627(0.480-0.820)  |
| AC114803.1   | <0.001        | 1.297(1.183-1.422)  |
| LINC02593    | <0.001        | 0.499(0.410-0.606)  |
| AL139246.1   | <0.001        | 0.172(0.081-0.365)  |
| AL354863.1   | <0.001        | 0.325(0.190-0.555)  |
| AC110015.1   | <0.001        | 1.273(1.152-1.407)  |
| AL596087.2   | <0.001        | 1.151(1.103-1.202)  |
| LINC01956    | <0.001        | 1.443(1.314-1.584)  |
| HOXB-AS1     | <0.001        | 1.259(1.172-1.353)  |
| AC074351.1   | <0.001        | 1.070(1.041-1.100)  |
| LINC02058    | <0.001        | 0.620(0.509-0.756)  |
| AL121827.2   | <0.001        | 0.958(0.945-0.972)  |
| AL354919.2   | <0.001        | 1.068(1.049-1.088)  |
| AC109439.1   | <0.001        | 0.552(0.450-0.678)  |
| AL390786.1   | <0.001        | 0.219(0.117-0.410)  |
| HAR1B        | <0.001        | 0.285(0.176-0.460)  |
| LINC02308    | <0.001        | 1.181(1.118-1.248)  |
| AC064875.1   | <0.001        | 1.265(1.199-1.334)  |
| HOTAIRM1     | <0.001        | 1.029(1.017-1.041)  |
| LINC02587    | <0.001        | 1.047(1.033-1.061)  |
| AC023421.1   | <0.001        | 0.380(0.244-0.591)  |
| AL355916.2   | <0.001        | 0.920(0.888-0.953)  |
| AC062021.1   | <0.001        | 0.881(0.843-0.922)  |
| AC125616.1   | 0.002         | 0.599(0.431-0.832)  |
| AC097713.1   | <0.001        | 1.141(1.074-1.212)  |
| CRNDE        | <0.001        | 1.239(1.189-1.292)  |
| AC026790.2   | <0.001        | 0.328(0.201-0.535)  |

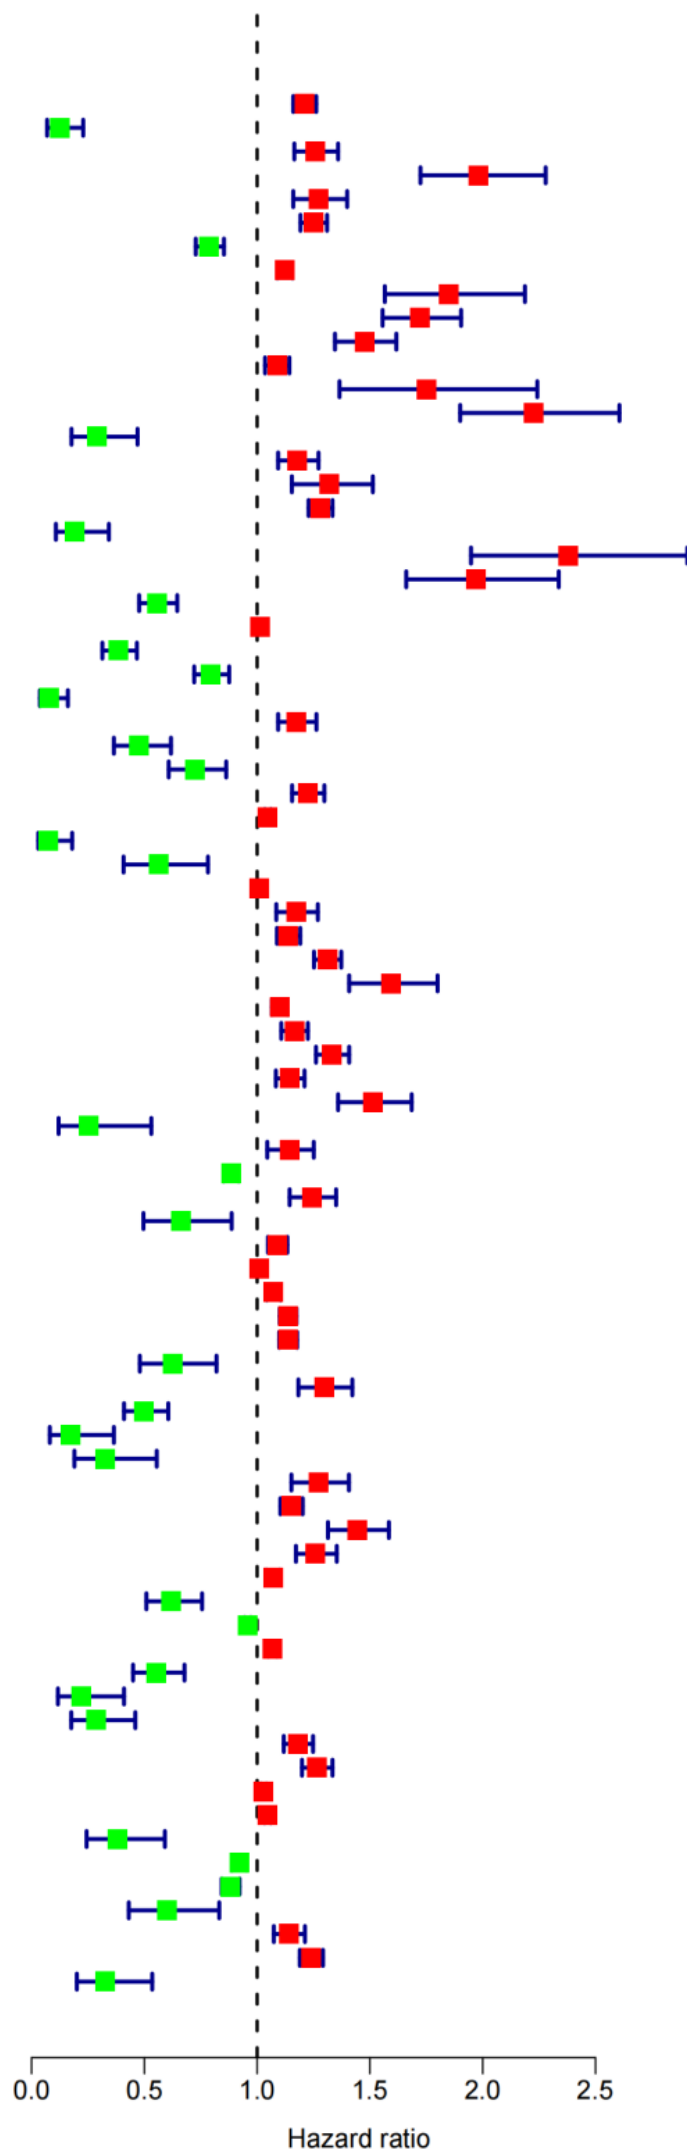

Supplement: FIG_S2.pdf [file FIG_S2.pdf]
