# Supplementary material for: Mutation-derived, genomic instability-associated lncRNAs are prognostic markers in gliomas
Source: PeerJ journal article supplement (doi:10.7717/peerj.15810), 2023-08-02
Supplement: FIG_S1.pdf [file FIG_S1.pdf]

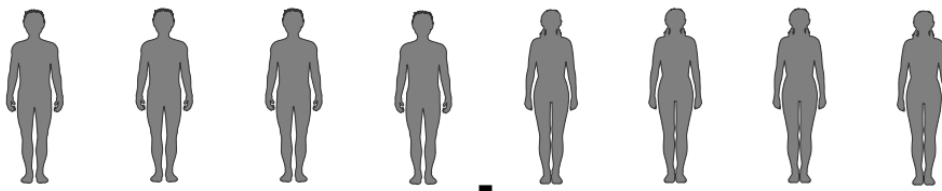

Somatic mutation profile

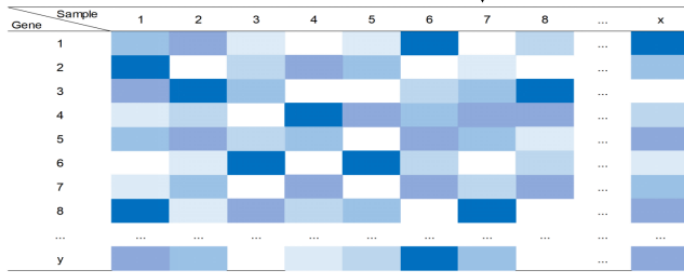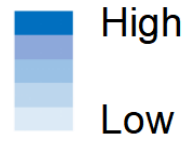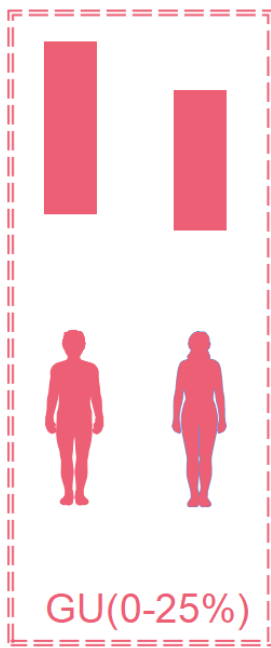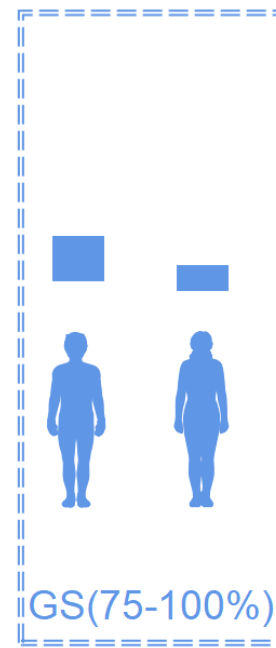

**lncRNA expression profile**

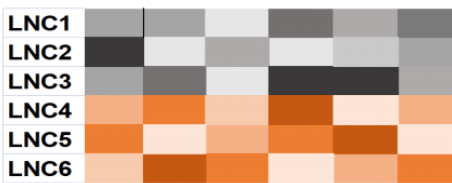

**lncRNA expression profile**

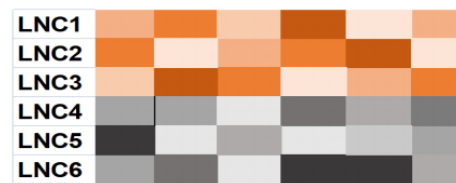

VS

Fliter

Field change

Pemutation correction

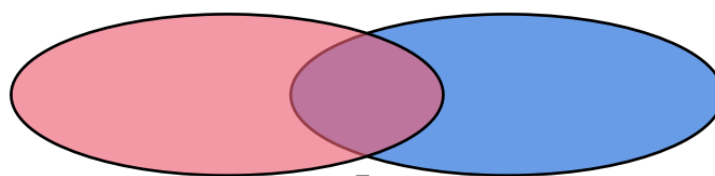

genome instability-related lncRNAs
