# Supplementary material for: Mutation-derived, genomic instability-associated lncRNAs are prognostic markers in gliomas
Source: PeerJ journal article supplement (doi:10.7717/peerj.15810), 2023-08-02
Supplement: FIG_S3.pdf [file FIG_S3.pdf]

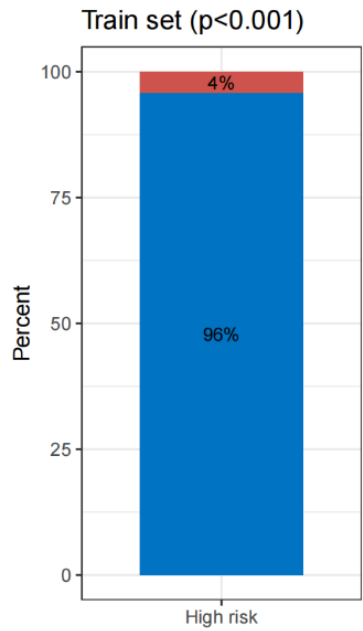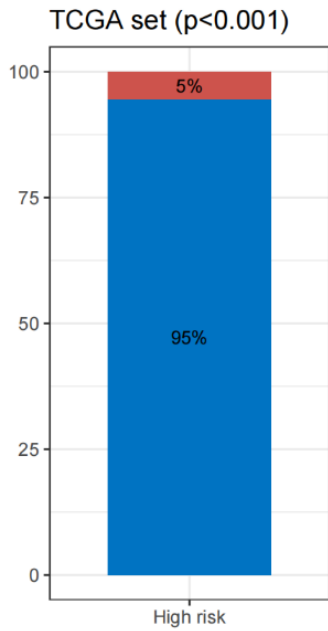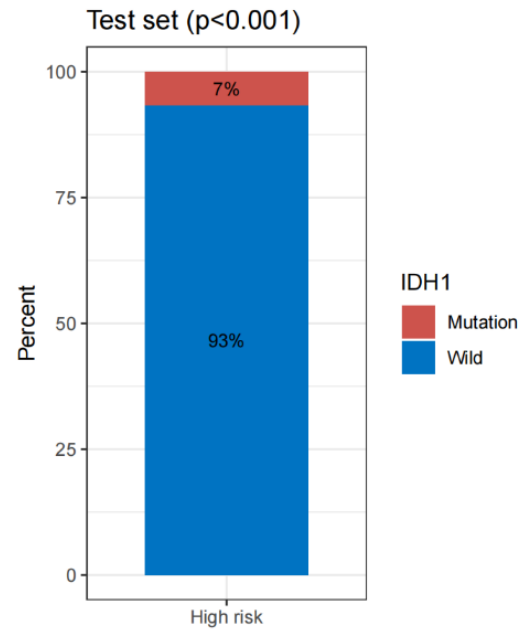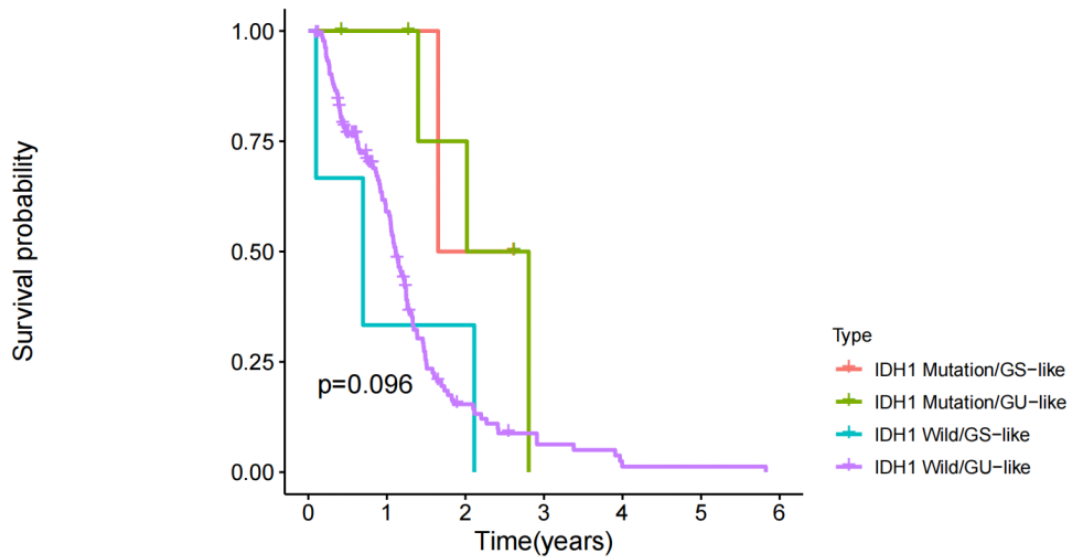

| Type                  | 0   | 1  | 2  | 3 | 4 | 5 | 6 |
|-----------------------|-----|----|----|---|---|---|---|
| IDH1 Mutation/GS-like | 2   | 2  | 1  | 0 | 0 | 0 | 0 |
| IDH1 Mutation/GU-like | 6   | 5  | 3  | 0 | 0 | 0 | 0 |
| IDH1 Wild/GS-like     | 3   | 1  | 1  | 0 | 0 | 0 | 0 |
| IDH1 Wild/GU-like     | 135 | 66 | 14 | 5 | 1 | 1 | 0 |

Time(years)
