# Supplementary material for: Mutation-derived, genomic instability-associated lncRNAs are prognostic markers in gliomas
Source: PeerJ journal article supplement (doi:10.7717/peerj.15810), 2023-08-02

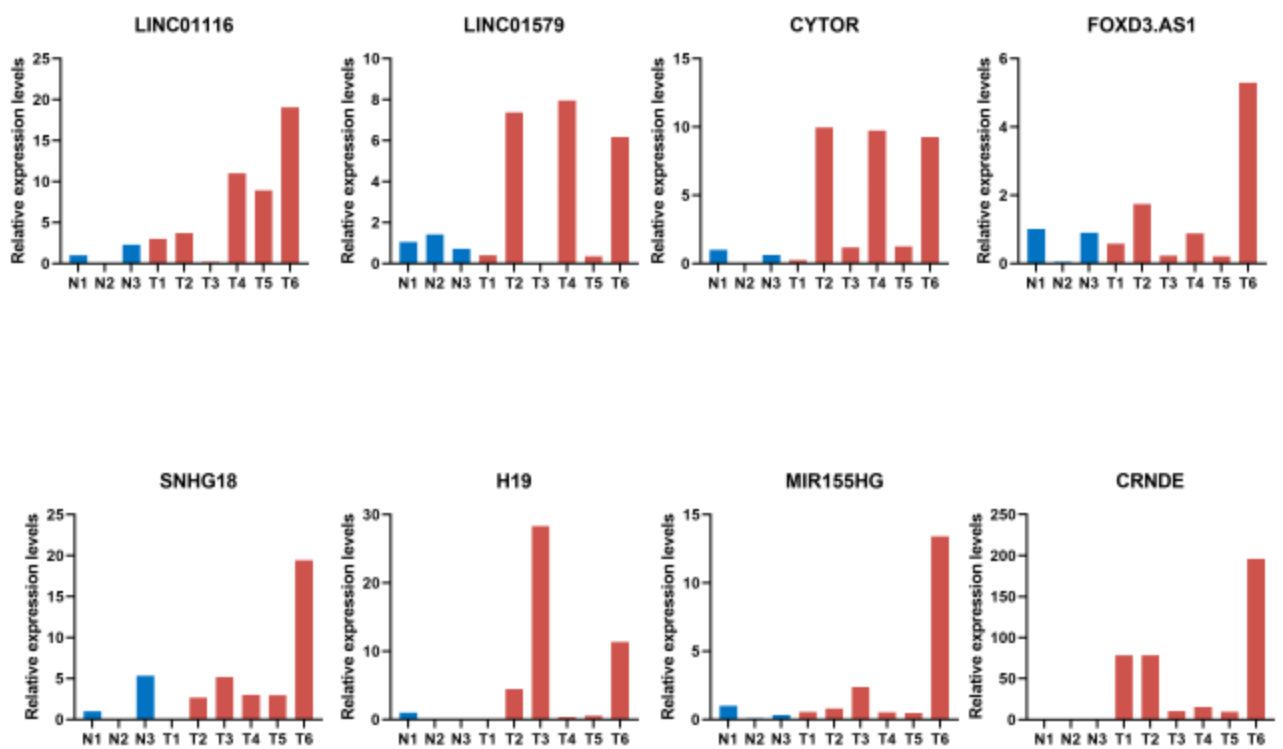

Supplement: FIG_S4.pdf [file FIG_S4.pdf]
