# Supplementary material for: Mutation-derived, genomic instability-associated lncRNAs are prognostic markers in gliomas
Source: PeerJ. 2023 Aug 2;11:e15810. doi: 10.7717/peerj.15810 (PMC10404032; doi:10.7717/peerj.15810)
Supplement: Supplemental Information 5 [file peerj-11-15810-s005.xlsx]

## Sheet: Sheet1
lncRNAs	GS Mean	GU Mean	logFC	pValue	fdr
LINC01579	0.432861	2.85417	2.72109	7.16e-31	6.14e-29
AC073365.1	0.406502	1.65899	2.02897	1.66e-07	4e-07
AL022344.1	0.819171	0.105995	-2.95016	4.96e-35	1.32e-32
HOXC-AS1	0.180636	1.59451	3.14195	2.2e-36	1.76e-33
AC025171.5	0.2143	1.43666	2.74502	8.86e-30	5.45e-28
AC007344.1	0.189713	1.02571	2.43474	1.17e-28	6.1e-27
LINC00499	0.660095	0.133939	-2.3011	2.87e-09	8.44e-09
MIR4435-2HG	0.563941	3.52362	2.64344	4.8e-36	2.25e-33
LINC00836	5.31167	1.01924	-2.38167	1.11e-26	3.51e-25
AC104024.2	0.720885	0.151374	-2.25165	0.000392856	0.000648186
LINC01116	0.757843	4.23967	2.48398	6.52e-10	2.06e-09
LINC02525	0.204936	0.948471	2.21043	1.15e-30	8.88e-29
MIR155HG	0.211799	1.18674	2.48624	1.3e-33	2.59e-31
PIK3CD-AS2	0.240919	1.30872	2.44153	1.48e-29	8.9e-28
AC005532.1	0.186925	1.11905	2.58174	2.69e-09	7.94e-09
EGFR-AS1	0.0916833	1.42519	3.95836	2.41e-08	6.3e-08
AC131097.3	0.181521	1.22267	2.75183	6.64e-29	3.62e-27
LINC00906	0.86398	0.199969	-2.11122	2.13e-21	2.85e-20
AC092957.1	0.172649	1.12127	2.69922	2.53e-10	8.42e-10
AC016168.2	0.195537	0.940886	2.26658	1.32e-18	1.2e-17
AC025165.4	0.51424	2.25332	2.13154	2.68e-06	5.71e-06
CYTOR	0.694603	4.726	2.76636	6.57e-36	2.25e-33
FAM201A	0.797903	0.181199	-2.13864	4.74e-26	1.31e-24
BX470102.1	0.201301	0.813806	2.01533	3.29e-28	1.49e-26
MIR924HG	0.13018	1.00221	2.9446	5.7e-25	1.35e-23
FP671120.7	0.02541	6.451	7.98798	2.05e-28	1e-26
AC015540.1	3.55547	0.809977	-2.13409	6.86e-31	6.1e-29
FP236383.5	0.0138101	4.00249	8.17903	4.52e-18	3.84e-17
AL390755.1	6.16139	30.2215	2.29425	1.01e-27	3.83e-26
AC092343.1	0.0168998	1.77942	6.71826	3.98e-08	1.01e-07
SLC25A21-AS1	2.30942	0.477635	-2.27355	5.57e-34	1.22e-31
LHX5-AS1	3.71954	0.576867	-2.68881	1.63e-12	6.97e-12
LINC02636	0.705086	0.124531	-2.50129	7.37e-32	9.3e-30
ELDR	0.0164538	12.3962	9.55726	3.39e-36	2.03e-33
FP671120.8	0.534551	12.5158	4.54928	1.5e-19	1.56e-18
HAR1A	1.56392	0.381288	-2.03621	6.94e-24	1.29e-22
OBI1-AS1	1.90019	0.391156	-2.28033	1.44e-26	4.37e-25
CNIH3-AS2	0.550711	2.25813	2.03576	1.59e-14	8.56e-14
AL035446.1	1.01751	9.30889	3.19357	2.33e-20	2.71e-19
MADD-AS1	0.657649	0.110825	-2.56904	9.64e-21	1.19e-19
DNMBP-AS1	0.953225	0.135146	-2.8183	2.1e-31	2.29e-29
H19	2.20183	12.0314	2.45003	3.19e-30	2.19e-28
AL049871.1	0.161043	1.45398	3.1745	3.19e-32	4.51e-30
AC008080.4	0.2819	1.4607	2.3734	0.00179386	0.00273409
AL133415.1	0.493579	4.68253	3.24593	2.21e-31	2.3e-29
AC010655.2	0.23642	1.0586	2.16274	5.44e-24	1.03e-22
SOCS2-AS1	0.393861	2.59715	2.72117	8.89e-26	2.37e-24
HOTAIR	0.146607	1.2811	3.12736	6.29e-39	1.51e-35
SNHG18	0.801268	3.21464	2.0043	8.06e-28	3.12e-26
AC021242.3	0.759504	3.26828	2.1054	1.52e-14	8.23e-14
LINC01831	0.170125	1.17582	2.78901	5.31e-20	5.79e-19
AC022239.1	0.600147	0.111384	-2.42977	2.51e-08	6.56e-08
CNIH3-AS1	0.113791	1.14552	3.33155	6.52e-21	8.19e-20
AL022313.4	8.43866	2.00702	-2.07196	1.13e-23	2e-22
AC091932.1	0.240532	1.53782	2.67659	7.32e-18	5.97e-17
AL391845.2	1.01663	0.129887	-2.96847	1.96e-28	9.78e-27
AL512785.1	0.347478	2.38381	2.77828	3.7e-25	9.15e-24
AGAP2-AS1	1.0565	21.1533	4.32352	8.23e-36	2.47e-33
AC092958.1	0.806032	3.98464	2.30554	2.02e-18	1.78e-17
FOXD3-AS1	0.898498	4.42967	2.30161	3.65e-26	1.02e-24
CDK6-AS1	0.194459	1.74602	3.16653	7.12e-22	1.03e-20
AC002428.2	1.34214	0.174316	-2.94476	2.72e-24	5.67e-23
AC114803.1	0.28661	1.35225	2.2382	1.74e-15	1.06e-14
LINC02593	2.65161	0.557519	-2.24978	6.73e-26	1.83e-24
AL139246.1	0.592691	0.136864	-2.11453	5.29e-20	5.79e-19
CELF2-DT	0.667848	0.138927	-2.26519	5.14e-05	9.43e-05
AL354863.1	1.10632	0.180649	-2.61451	5.68e-16	3.73e-15
AC110015.1	0.228937	0.964858	2.07537	5.78e-22	8.45e-21
AL596087.2	0.201515	1.27363	2.65998	5.03e-21	6.48e-20
LINC01956	0.177338	1.03106	2.53956	7.32e-28	2.93e-26
LINC01007	0.699499	0.0461626	-3.92153	9.73e-06	1.96e-05
HOXB-AS1	0.137663	1.25039	3.18316	4.88e-24	9.29e-23
AC074351.1	0.407283	7.56457	4.21515	1.94e-11	7.32e-11
LINC02058	1.61451	0.301885	-2.41903	7.47e-25	1.72e-23
AL121827.2	32.4315	7.96764	-2.02517	1.23e-26	3.84e-25
AL354919.2	1.09005	5.26107	2.27096	3.14e-26	8.86e-25
AC109439.1	2.8328	0.291873	-3.27882	9.1e-31	7.27e-29
AL390786.1	0.668536	0.142825	-2.22676	8.07e-26	2.17e-24
HAR1B	0.738003	0.177788	-2.05347	1.6e-22	2.54e-21
LINC02308	0.495953	2.40346	2.27684	1.64e-26	4.91e-25
AC064875.1	0.313516	2.79448	3.15597	2.59e-33	4.79e-31
HOTAIRM1	0.613082	5.68762	3.21367	3.42e-28	1.51e-26
LINC02587	0.644421	8.51636	3.72416	4.83e-31	4.46e-29
AC023421.1	1.92763	0.244089	-2.98135	5.79e-14	2.89e-13
AL355916.2	11.245	2.26664	-2.31065	4.91e-14	2.47e-13
ANKRD62P1-PARP4P3	0.886754	0.0259476	-5.09486	3.71e-24	7.3e-23
AC062021.1	8.91162	1.32874	-2.74563	8.98e-29	4.79e-27
AC125616.1	0.91575	0.158699	-2.52866	2.08e-17	1.61e-16
AC097713.1	0.141658	1.14923	3.02018	1.88e-27	6.83e-26
CRNDE	0.960483	4.59735	2.25897	3.02e-26	8.63e-25
AC026790.2	0.684324	0.159108	-2.10467	2.54e-17	1.94e-16
